# Supplementary material for: NANOGP8: Evolution of a Human-Specific Retro-Oncogene
Source: PubMed Central journal article supplement (PMC3484675; doi:10.1534/g3.112.004366), 2012-11-01
Supplement: supp_2.11.1447_004366SI.pdf [file supp_2.11.1447_004366SI.pdf]

File S1

**Table S1** Genotypes at ten single-nucleotide substitution variant positions in *NANOGP8* from cloned DNA obtained from 10 geographically diverse individuals. For all but one individual (NA07038\*D2), two clones were sequenced; the nucleotide in clone 1 is listed first, and the nucleotide in clone 2 listed second. Variants with a frequency of zero are variants identified in previous studies but not present in the sequences we examined.

| Coriell ID<br>for DNA           | Population                   | Nucleotide at Variant Positions in Coding Sequence |      |      |      |      |      |      |      |      |      |
|---------------------------------|------------------------------|----------------------------------------------------|------|------|------|------|------|------|------|------|------|
|                                 |                              | -135                                               | 47   | 190  | 552  | 629  | 754  | *7   | *44  | *313 | *315 |
| NA17347*3                       | AFRICANS SOUTH OF THE SAHARA | T T                                                | C C  | G G  | A A  | C C  | A A  | G G  | G G  | C C  | T T  |
| NA17344*A1                      | AFRICANS SOUTH OF THE SAHARA | T T                                                | C C  | G G  | A A  | T C  | A A  | G G  | G G  | C C  | T T  |
| NA10472*A2                      | BIAKA PYGMY POPULATION       | T C                                                | C C  | G G  | A A  | T C  | A A  | A G  | G G  | C C  | C C  |
| NA07038*D2                      | CEPH/UTAH PEDIGREE 1333      | T                                                  | C    | G    | A    | C    | A    | G    | G    | C    | C    |
| NA11521*3                       | DRUZE POPULATION             | T T                                                | C A  | G G  | A A  | T C  | A A  | A G  | G G  | C C  | C C  |
| NA17030*1                       | INDO PAKISTANI               | T T                                                | C C  | T T  | G G  | C C  | A A  | G G  | G G  | C C  | C C  |
| NA10492*A2                      | MBUTI PYGMY POPULATION       | T T                                                | C C  | G G  | A A  | C C  | A A  | G G  | A G  | C C  | C T  |
| NA10496*A3                      | MBUTI PYGMY POPULATION       | T T                                                | C C  | G G  | A A  | C C  | A A  | G G  | G G  | C C  | T T  |
| NA17387*1                       | PACIFIC                      | C T                                                | C C  | G T  | A G  | C C  | A A  | G G  | G G  | C C  | C C  |
| NA13618*2                       | RUSSIAN - KRASNODAR          | T T                                                | C C  | G G  | A A  | C C  | A A  | G G  | G G  | C C  | T T  |
| Frequency of Derived Nucleotide |                              | 0.11                                               | 0.05 | 0.16 | 0.16 | 0.16 | 0.00 | 0.11 | 0.05 | 0.00 | 0.47 |

## File S2

Table S2 Genotypes at six variant positions in *NANOGP8* from single-pass sequences in exon 4 from 94 geographically diverse individuals

| Coriell ID<br>for DNA<br>Sample | Population                   | Genotype at Variant Positions in Coding Sequence |         |         |            |         |         |
|---------------------------------|------------------------------|--------------------------------------------------|---------|---------|------------|---------|---------|
|                                 |                              | 552                                              | 629     | 754     | 916–917    | *7      | *44     |
| NA17347*3                       | AFRICANS SOUTH OF THE SAHARA | hom A/A                                          | hom C/C | hom A/A | hom TG/TG  | hom G/G | hom G/G |
| NA17344*A1                      | AFRICANS SOUTH OF THE SAHARA | hom A/A                                          | het C/T | hom A/A | hom TG/TG  | hom A/A | hom G/G |
| NA10472*A2                      | BIAKA PYGMY POPULATION       | hom A/A                                          | het C/T | hom A/A | hom TG/TG  | het G/A | hom G/G |
| NA07038*D2                      | CEPH/UTAH PEDIGREE 1333      | hom A/A                                          | hom C/C | het A/C | het TG/del | hom G/G |         |
| NA10492*A2                      | MBUTI PYGMY POPULATION       | hom A/A                                          | hom C/C | hom A/A | hom TG/TG  | hom G/G | het G/A |
| NA10496*A3                      | MBUTI PYGMY POPULATION       | hom A/A                                          | hom C/C | hom A/A | hom TG/TG  | hom G/G | hom G/G |
| NA17387*1                       | PACIFIC                      | het A/G                                          | hom C/C | hom A/A | hom TG/TG  | hom G/G | hom G/G |
| NA13618*2                       | RUSSIAN - KRASNODAR          | hom A/A                                          | hom C/C | hom A/A | hom TG/TG  | hom G/G | hom G/G |
| NA17348*1                       | AFRICANS SOUTH OF THE SAHARA | hom A/A                                          | hom C/C | hom A/A | hom TG/TG  | hom G/G | het G/A |
| NA17343*1                       | AFRICANS SOUTH OF THE SAHARA | hom A/A                                          | hom C/C | hom A/A | hom TG/TG  | hom G/G | het G/A |
| NA10473*A3                      | BIAKA PYGMY POPULATION       | hom A/A                                          | hom C/C | hom A/A | hom TG/TG  | hom G/G | het G/A |
| NA17033*1                       | AFRICAN AMERICAN             | hom A/A                                          | hom C/C | hom A/A | hom TG/TG  | hom G/G | hom A/A |
| NA17172*A1                      | AFRICAN AMERICAN             | hom A/A                                          | het C/T | het A/C | het TG/del | het G/A |         |
| NA17161*A2                      | AFRICAN AMERICAN             | hom A/A                                          | het C/T | hom A/A | hom TG/TG  | het G/A | hom G/G |
| NA17062*A1                      | MEXICAN                      | hom A/A                                          | het C/T | hom A/A | hom TG/TG  | het G/A | hom G/G |
| NA17036*A1                      | AFRICAN AMERICAN             | hom A/A                                          | het C/T | hom A/A | hom TG/TG  | hom A/A | hom G/G |
| NA13617*1                       | RUSSIAN - KRASNODA           | hom A/A                                          | het C/T | hom A/A | hom TG/TG  | hom A/A | hom G/G |
| NA17032*A1                      | AFRICAN AMERICAN             | hom A/A                                          | het C/T | hom A/A | hom TG/TG  | hom A/A | hom G/G |

|            |                              |         |         |         |           |         |         |
|------------|------------------------------|---------|---------|---------|-----------|---------|---------|
| NA10470*A3 | BIAKA PYGMY POPULATION       | hom A/A | het C/T | hom A/A | hom TG/TG | hom A/A | hom G/G |
| NA17342*2  | AFRICANS SOUTH OF THE SAHARA | hom A/A | hom C/C | hom A/A | hom TG/TG | hom A/A | hom G/G |
| NA13609*1  | AMI POPULATION               | hom A/A | hom T/T | hom A/A | hom TG/TG | hom A/A | hom G/G |
| NA17636*1  | MEXICAN-AMERICAN             | hom A/A | hom T/T | hom A/A | hom TG/TG | hom A/A | hom G/G |
| NA17341*2  | AFRICANS SOUTH OF THE SAHARA | hom A/A | hom T/T | hom A/A | hom TG/TG | hom A/A | hom G/G |
| NA17057*4  | JAPANESE                     | hom A/A | hom T/T | hom A/A | hom TG/TG | hom A/A | hom G/G |
| NA17028*2  | INDO PAKISTANI               | het A/G | hom C/C | hom A/A | hom TG/TG | hom G/G | hom G/G |
| NA17317*A1 | SOUTH AMERICA                | het A/G | hom C/C | hom A/A | hom TG/TG | hom G/G | hom G/G |
| NA17076*2  | PUERTO RICAN                 | het A/G | hom C/C | hom A/A | hom TG/TG | hom G/G | hom G/G |
| NA17065*A5 | MEXICAN                      | het A/G | hom C/C | hom A/A | hom TG/TG | hom G/G | hom G/G |
| NA10849*5  | CEPH/UTAH PEDIGREE 1332      | het A/G | hom C/C | hom A/A | hom TG/TG | hom G/G | hom G/G |
| NA12911*2  | CEPH/UTAH PEDIGREE 1582      | het A/G | hom C/C | hom A/A | hom TG/TG | hom G/G | hom G/G |
| NA17313*A1 | SOUTH AMERICA                | het A/G | hom C/C | hom A/A | hom TG/TG | hom G/G | hom G/G |
| NA17040*A1 | AFRICAN AMERICAN             | hom A/A | hom C/C | hom A/A | hom TG/TG | hom G/G | hom G/G |
| NA17039*1  | AFRICAN AMERICAN             | hom A/A | hom C/C | hom A/A | hom TG/TG | hom G/G | hom G/G |
| NA17037*1  | AFRICAN AMERICAN             | hom A/A | hom C/C | hom A/A | hom TG/TG | hom G/G | hom G/G |
| NA17166*A1 | AFRICAN AMERICAN             | hom A/A | hom C/C | hom A/A | hom TG/TG | hom G/G | hom G/G |
| NA17345*2  | AFRICANS SOUTH OF THE SAHARA | hom A/A | hom C/C | hom A/A | hom TG/TG | hom G/G | hom G/G |
| NA17346*2  | AFRICANS SOUTH OF THE SAHARA | hom A/A | hom C/C | hom A/A | hom TG/TG | hom G/G | hom G/G |
| NA07057*D2 | CEPH/UTAH PEDIGREE 1331      | hom A/A | hom C/C | hom A/A | hom TG/TG | hom G/G | hom G/G |
| NA10858*B1 | CEPH/UTAH PEDIGREE 1347      | hom A/A | hom C/C | hom A/A | hom TG/TG | hom G/G | hom G/G |
| NA11993*C1 | CEPH/UTAH PEDIGREE 1362      | hom A/A | hom C/C | hom A/A | hom TG/TG | hom G/G | hom G/G |
| NA12909*2  | CEPH/UTAH PEDIGREE 1477      | hom A/A | hom C/C | hom A/A | hom TG/TG | hom G/G | hom G/G |
| NA17710*1  | MEXICAN-AMERICAN             | hom A/A | hom C/C | hom A/A | hom TG/TG | hom G/G | hom G/G |
| NA17443*2  | MEXICAN-AMERICAN             | hom A/A | hom C/C | hom A/A | hom TG/TG | hom G/G | hom G/G |
| NA18460*1  | NOT IDENTIFIED               | hom A/A | hom C/C | hom A/A | hom TG/TG | hom G/G | hom G/G |

|            |                         |         |         |         |           |         |         |
|------------|-------------------------|---------|---------|---------|-----------|---------|---------|
| NA17072*A1 | PUERTO RICAN            | hom A/A | hom C/C | hom A/A | hom TG/TG | hom G/G | hom G/G |
| NA17071*A2 | PUERTO RICAN            | hom A/A | hom C/C | hom A/A | hom TG/TG | hom G/G | hom G/G |
| NA17314*2  | SOUTH AMERICA           | hom A/A | hom C/C | hom A/A | hom TG/TG | hom G/G | hom G/G |
| NA17088*2  | SOUTHEAST ASIANS        | hom A/A | hom C/C | hom A/A | hom TG/TG | hom G/G | hom G/G |
| NA12273*B2 | CEPH/UTAH PEDIGREE 1418 | hom A/A | hom C/C | hom A/A | hom TG/TG | hom G/G | hom G/G |
| NA11522*4  | DRUZE POPULATION        | hom A/A | hom C/C | hom A/A | hom TG/TG | hom G/G | hom G/G |
| NA11524*3  | DRUZE POPULATION        | hom A/A | hom C/C | hom A/A | hom TG/TG | hom G/G | hom G/G |
| NA17066*2  | MEXICAN                 | hom A/A | hom C/C | hom A/A | hom TG/TG | hom G/G | hom G/G |
| NA17634*1  | MEXICAN-AMERICAN        | hom A/A | hom C/C | hom A/A | hom TG/TG | hom G/G | hom G/G |
| NA17311*A5 | SOUTH AMERICA           | hom A/A | hom C/C | hom A/A | hom TG/TG | hom G/G | hom G/G |
| NA06990*F1 | CEPH/UTAH PEDIGREE 1331 | hom A/A | hom C/C | hom A/A | hom TG/TG | hom G/G | hom G/G |
| NA17017*5  | CHINESE (VERSION 1)     | hom A/A | hom C/C | hom A/A | hom TG/TG | hom G/G | hom G/G |
| NA17016*3  | CHINESE (VERSION 1)     | hom A/A | hom C/C | hom A/A | hom TG/TG | hom G/G | hom G/G |
| NA17058*3  | JAPANESE                | hom A/A | hom C/C | hom A/A | hom TG/TG | hom G/G | hom G/G |
| NA17060*3  | JAPANESE                | hom A/A | hom C/C | hom A/A | hom TG/TG | hom G/G | hom G/G |
| NA17391*2  | PACIFIC                 | hom A/A | hom C/C | hom A/A | hom TG/TG | hom G/G | hom G/G |
| NA10832*3  | CEPH/UTAH PEDIGREE 1413 | hom A/A | hom C/C | hom A/A | hom TG/TG | hom G/G | hom G/G |
| NA17389*2  | PACIFIC                 | hom A/A | hom C/C | hom A/A | hom TG/TG | hom G/G | hom G/G |
| NA17388*1  | PACIFIC                 | hom A/A | hom C/C | hom A/A | hom TG/TG | hom G/G | hom G/G |
| NA17073*A1 | PUERTO RICAN            | hom A/A | hom C/C | hom A/A | hom TG/TG | hom G/G | hom G/G |
| NA17056*B2 | JAPANESE                | hom A/A | hom C/C | hom A/A | hom TG/TG | hom G/G | hom G/G |
| NA10494*A3 | MBUTI PYGMY POPULATION  | hom A/A | hom C/C | hom A/A | hom TG/TG | hom G/G | hom G/G |
| NA17700*1  | MEXICAN-AMERICAN        | hom A/A | hom C/C | hom A/A | hom TG/TG | hom G/G | hom G/G |
| NA17075*2  | PUERTO RICAN            | hom A/A | hom C/C | hom A/A | hom TG/TG | hom G/G | hom G/G |
| NA17074*3  | PUERTO RICAN            | hom A/A | hom C/C | hom A/A | hom TG/TG | hom G/G | hom G/G |
| NA17315*1  | SOUTH AMERICA           | hom A/A | hom C/C | hom A/A | hom TG/TG | hom G/G | hom G/G |

|                                 |                              |         |         |         |            |         |         |
|---------------------------------|------------------------------|---------|---------|---------|------------|---------|---------|
| NA17087*2                       | SOUTHEAST ASIANS             | hom A/A | hom C/C | hom A/A | hom TG/TG  | hom G/G | hom G/G |
| NA17316*2                       | SOUTH AMERICA                | hom A/A | hom C/C | hom A/A | hom TG/TG  | hom G/G | hom G/G |
| NA17167*2                       | AFRICAN AMERICAN             | hom A/A | hom C/C | hom A/A | hom TG/TG  | hom G/G | hom G/G |
| NA07349*B1                      | CEPH/UTAH PEDIGREE 1345      | hom A/A | hom C/C | hom A/A | hom TG/TG  | hom G/G | hom G/G |
| NA10860*B1                      | CEPH/UTAH PEDIGREE 1362      | hom A/A | hom C/C | hom A/A | hom TG/TG  | hom G/G | hom G/G |
| NA10831*A7                      | CEPH/UTAH PEDIGREE 1408      | hom A/A | hom C/C | hom A/A | hom TG/TG  | hom G/G | hom G/G |
| NA10833*4                       | CEPH/UTAH PEDIGREE 1413      | hom A/A | hom C/C | hom A/A | hom TG/TG  | hom G/G | hom G/G |
| NA12813*5                       | CEPH/UTAH PEDIGREE 1454      | hom A/A | hom C/C | hom A/A | hom TG/TG  | hom G/G | hom G/G |
| NA12841*3                       | CEPH/UTAH PEDIGREE 1458      | hom A/A | hom C/C | hom A/A | hom TG/TG  | hom G/G | hom G/G |
| NA11523*3                       | DRUZE POPULATION             | hom A/A | hom C/C | hom A/A | hom TG/TG  | hom G/G | hom G/G |
| NA11525*3                       | DRUZE POPULATION             | hom A/A | hom C/C | hom A/A | hom TG/TG  | hom G/G | hom G/G |
| NA17067*A1                      | MEXICAN                      | hom A/A | hom C/C | hom A/A | hom TG/TG  | hom G/G | hom G/G |
| NA17701*2                       | MEXICAN-AMERICAN             | hom A/A | hom C/C | hom A/A | hom TG/TG  | hom G/G | hom G/G |
| NA13611*2                       | AMI POPULATION               | hom G/G | hom C/C | hom A/A | hom TG/TG  | hom G/G | hom G/G |
| NA13607*5                       | AMI POPULATION               | hom G/G | hom C/C | hom A/A | hom TG/TG  | hom G/G | hom G/G |
| NA17349*3                       | AFRICANS SOUTH OF THE SAHARA | hom A/A | hom T/T | hom A/A | hom TG/TG  | hom G/G | hom G/G |
| NA06987*D6                      | CEPH/UTAH PEDIGREE 1333      | hom A/A | hom C/C | hom C/C | hom del    | hom G/G | hom G/G |
| NA17158*3                       | AFRICAN AMERICAN             | hom A/A | hom C/C | hom C/C | hom del    | hom G/G | hom G/G |
| NA17035*A1                      | AFRICAN AMERICAN             | hom A/A | het C/T | het A/C | het TG/del | het G/A |         |
| NA17038*A1                      | AFRICAN AMERICAN             | hom A/A | het C/T | het A/C | het TG/del | het G/A |         |
| NA17061*A3                      | MEXICAN                      | hom A/A | hom C/C | het A/C | het TG/del | hom G/G |         |
| NA17034*A2                      | AFRICAN AMERICAN             | hom A/A | hom C/C | het A/C | het TG/del | hom G/G |         |
| NA17078*1                       | PUERTO RICAN                 | hom A/A | hom C/C | het A/C | het TG/del | hom G/G |         |
| NA10861*B3                      | CEPH/UTAH PEDIGREE 1362      | het A/G | hom C/C | hom A/A | het TG/del | hom G/G |         |
| Frequency of Derived Nucleotide |                              | 0.07    | 0.11    | 0.06    | 0.06       | 0.14    | 0.03    |

File S3

**Table S3** Genotypes at two single-nucleotide substitution variant positions in *NANOG* from single-pass sequences in exon 4 from 94 geographically diverse individuals, and genotypes for the 22 bp deletion at position \*552–\*573, as determined by PCR analysis in 119 geographically diverse individuals.

| Coriell ID<br>for DNA<br>Sample | Population                   | Genotype at Variant Positions in Coding Sequence |         |             |
|---------------------------------|------------------------------|--------------------------------------------------|---------|-------------|
|                                 |                              | 531                                              | 798     | *552–*573   |
| NA17347*3                       | AFRICANS SOUTH OF THE SAHARA | het C/T                                          | het C/T | het =/del   |
| NA17344*A1                      | AFRICANS SOUTH OF THE SAHARA | hom C/C                                          | het C/T | hom del/del |
| NA10472*A2                      | BIAKA PYGMY POPULATION       | hom T/T                                          | hom C/C | hom del/del |
| NA07038*D2                      | CEPH/UTAH PEDIGREE 1333      | hom C/C                                          | hom T/T | hom =/=     |
| NA11521*3                       | DRUZE POPULATION             |                                                  |         | hom =/=     |
| NA17030*1                       | INDO PAKISTANI               |                                                  |         | hom =/=     |
| NA10492*A2                      | MBUTI PYGMY POPULATION       | hom C/C                                          | hom T/T | hom =/=     |
| NA10496*A3                      | MBUTI PYGMY POPULATION       | hom T/T                                          | hom C/C | het =/del   |
| NA17387*1                       | PACIFIC                      | hom T/T                                          | hom C/C | hom =/=     |
| NA13618*2                       | RUSSIAN - KRASNODAR          | het C/T                                          | het C/T | hom =/=     |
| NA17348*1                       | AFRICANS SOUTH OF THE SAHARA | het C/T                                          | het C/T | het =/del   |
| NA17343*1                       | AFRICANS SOUTH OF THE SAHARA | het C/T                                          | het C/T | het =/del   |
| NA10473*A3                      | BIAKA PYGMY POPULATION       | het C/T                                          | het C/T | het =/del   |
| NA17033*1                       | AFRICAN AMERICAN             | het C/T                                          | het C/T | het =/del   |
| NA17172*A1                      | AFRICAN AMERICAN             | het C/T                                          | het C/T | het =/del   |
| NA17161*A2                      | AFRICAN AMERICAN             | hom T/T                                          | hom C/C | hom del/del |
| NA17062*A1                      | MEXICAN                      | hom C/C                                          | hom T/T | hom =/=     |

|            |                              |         |         |             |
|------------|------------------------------|---------|---------|-------------|
| NA17036*A1 | AFRICAN AMERICAN             | het C/T | het C/T | het =/del   |
| NA13617*1  | RUSSIAN - KRASNODA           | het C/T | het C/T | het =/del   |
| NA17032*A1 | AFRICAN AMERICAN             | hom T/T | hom C/C | hom del/del |
| NA10470*A3 | BIAKA PYGMY POPULATION       | hom C/C | hom T/T | hom =/=     |
| NA17342*2  | AFRICANS SOUTH OF THE SAHARA | het C/T | het C/T | het =/del   |
| NA13609*1  | AMI POPULATION               | het C/T | het C/T | het =/del   |
| NA17636*1  | MEXICAN-AMERICAN             | het C/T | het C/T | het =/del   |
| NA17341*2  | AFRICANS SOUTH OF THE SAHARA | het C/T | het C/T | hom del/del |
| NA17057*4  | JAPANESE                     | hom T/T | hom C/C | het =/del   |
| NA17028*2  | INDO PAKISTANI               | het C/T | het C/T | hom =/=     |
| NA17317*A1 | SOUTH AMERICA                | het C/T | het C/T | hom =/=     |
| NA17076*2  | PUERTO RICAN                 | het C/T | het C/T | hom del/del |
| NA17065*A5 | MEXICAN                      | hom T/T | hom C/C | het =/del   |
| NA10849*5  | CEPH/UTAH PEDIGREE 1332      | hom C/C | hom T/T | hom =/=     |
| NA12911*2  | CEPH/UTAH PEDIGREE 1582      | hom C/C | hom T/T | hom =/=     |
| NA17313*A1 | SOUTH AMERICA                | hom C/C | hom T/T | hom =/=     |
| NA17040*A1 | AFRICAN AMERICAN             | het C/T | het C/T | het =/del   |
| NA17039*1  | AFRICAN AMERICAN             | het C/T | het C/T | het =/del   |
| NA17037*1  | AFRICAN AMERICAN             | het C/T | het C/T | het =/del   |
| NA17166*A1 | AFRICAN AMERICAN             | het C/T | het C/T | het =/del   |
| NA17345*2  | AFRICANS SOUTH OF THE SAHARA | het C/T | het C/T | het =/del   |
| NA17346*2  | AFRICANS SOUTH OF THE SAHARA | het C/T | het C/T | het =/del   |
| NA07057*D2 | CEPH/UTAH PEDIGREE 1331      | het C/T | het C/T | het =/del   |
| NA10858*B1 | CEPH/UTAH PEDIGREE 1347      | het C/T | het C/T | het =/del   |
| NA11993*C1 | CEPH/UTAH PEDIGREE 1362      | het C/T | het C/T | het =/del   |
| NA12909*2  | CEPH/UTAH PEDIGREE 1477      | het C/T | het C/T | het =/del   |

|            |                         |         |         |             |
|------------|-------------------------|---------|---------|-------------|
| NA17710*1  | MEXICAN-AMERICAN        | het C/T | het C/T | het =/del   |
| NA17443*2  | MEXICAN-AMERICAN        | het C/T | het C/T | het =/del   |
| NA18460*1  | NOT IDENTIFIED          | het C/T | het C/T | het =/del   |
| NA17072*A1 | PUERTO RICAN            | het C/T | het C/T | het =/del   |
| NA17071*A2 | PUERTO RICAN            | het C/T | het C/T | het =/del   |
| NA17314*2  | SOUTH AMERICA           | het C/T | het C/T | het =/del   |
| NA17088*2  | SOUTHEAST ASIANS        | het C/T | het C/T | het =/del   |
| NA12273*B2 | CEPH/UTAH PEDIGREE 1418 | het C/T | het C/T | hom =/=     |
| NA11522*4  | DRUZE POPULATION        | het C/T | het C/T | hom =/=     |
| NA11524*3  | DRUZE POPULATION        | het C/T | het C/T | hom =/=     |
| NA17066*2  | MEXICAN                 | het C/T | het C/T | hom =/=     |
| NA17634*1  | MEXICAN-AMERICAN        | het C/T | het C/T | hom =/=     |
| NA17311*A5 | SOUTH AMERICA           | het C/T | het C/T | hom =/=     |
| NA06990*F1 | CEPH/UTAH PEDIGREE 1331 | hom T/T | hom C/C | het =/del   |
| NA17017*5  | CHINESE (VERSION 1)     | hom T/T | hom C/C | het =/del   |
| NA17016*3  | CHINESE (VERSION 1)     | hom T/T | hom C/C | het =/del   |
| NA17058*3  | JAPANESE                | hom T/T | hom C/C | het =/del   |
| NA17060*3  | JAPANESE                | hom T/T | hom C/C | het =/del   |
| NA17391*2  | PACIFIC                 | hom T/T | hom C/C | het =/del   |
| NA10832*3  | CEPH/UTAH PEDIGREE 1413 | hom T/T | hom C/C | hom =/=     |
| NA17389*2  | PACIFIC                 | hom T/T | hom C/C | hom =/=     |
| NA17388*1  | PACIFIC                 | hom T/T | hom C/C | hom =/=     |
| NA17073*A1 | PUERTO RICAN            | hom T/T | hom C/C | hom =/=     |
| NA17056*B2 | JAPANESE                | hom T/T | hom C/C | hom del/del |
| NA10494*A3 | MBUTI PYGMY POPULATION  | hom T/T | hom C/C | hom del/del |
| NA17700*1  | MEXICAN-AMERICAN        | hom T/T | hom C/C | hom del/del |



|            |                              |         |         |             |
|------------|------------------------------|---------|---------|-------------|
| NA17075*2  | PUERTO RICAN                 | hom T/T | hom C/C | hom del/del |
| NA17074*3  | PUERTO RICAN                 | hom T/T | hom C/C | hom del/del |
| NA17315*1  | SOUTH AMERICA                | hom T/T | hom C/C | hom del/del |
| NA17087*2  | SOUTHEAST ASIANS             | hom T/T | hom C/C | hom del/del |
| NA17316*2  | SOUTH AMERICA                | hom C/C | hom T/T | het =/del   |
| NA17167*2  | AFRICAN AMERICAN             | hom C/C | hom T/T | hom =/=     |
| NA07349*B1 | CEPH/UTAH PEDIGREE 1345      | hom C/C | hom T/T | hom =/=     |
| NA10860*B1 | CEPH/UTAH PEDIGREE 1362      | hom C/C | hom T/T | hom =/=     |
| NA10831*A7 | CEPH/UTAH PEDIGREE 1408      | hom C/C | hom T/T | hom =/=     |
| NA10833*4  | CEPH/UTAH PEDIGREE 1413      | hom C/C | hom T/T | hom =/=     |
| NA12813*5  | CEPH/UTAH PEDIGREE 1454      | hom C/C | hom T/T | hom =/=     |
| NA12841*3  | CEPH/UTAH PEDIGREE 1458      | hom C/C | hom T/T | hom =/=     |
| NA11523*3  | DRUZE POPULATION             | hom C/C | hom T/T | hom =/=     |
| NA11525*3  | DRUZE POPULATION             | hom C/C | hom T/T | hom =/=     |
| NA17067*A1 | MEXICAN                      | hom C/C | hom T/T | hom =/=     |
| NA17701*2  | MEXICAN-AMERICAN             | hom C/C | hom T/T | hom =/=     |
| NA13611*2  | AMI POPULATION               | hom T/T | hom C/C | het =/del   |
| NA13607*5  | AMI POPULATION               | hom T/T | hom C/C | hom del/del |
| NA17349*3  | AFRICANS SOUTH OF THE SAHARA | hom C/C | hom T/T | hom =/=     |
| NA06987*D6 | CEPH/UTAH PEDIGREE 1333      | het C/T | het C/T | het =/del   |
| NA17158*3  | AFRICAN AMERICAN             | hom C/C | hom T/T | hom =/=     |
| NA17035*A1 | AFRICAN AMERICAN             | het C/T | het C/T | hom del/del |
| NA17038*A1 | AFRICAN AMERICAN             | hom T/T | hom C/C | het =/del   |
| NA17061*A3 | MEXICAN                      | het C/T | het C/T | het =/del   |
| NA17034*A2 | AFRICAN AMERICAN             | hom T/T | hom C/C | hom del/del |
| NA17078*1  | PUERTO RICAN                 | hom T/T | hom C/C | hom del/del |

|            |                                |         |         |             |
|------------|--------------------------------|---------|---------|-------------|
| NA10861*B3 | <u>CEPH/UTAH PEDIGREE 1362</u> | het C/T | het C/T | het =/del   |
| NA10469*B1 | <u>BIAKA PYGMY POPULATION</u>  |         |         | het =/del   |
| NA10859*D3 | CEPH/UTAH PEDIGREE 1347        |         |         | het =/del   |
| NA12749*3  | CEPH/UTAH PEDIGREE 1444        |         |         | het =/del   |
| NA12912*3  | CEPH/UTAH PEDIGREE 1582        |         |         | het =/del   |
| NA17018*A2 | CHINESE                        |         |         | het =/del   |
| NA17019*A2 | CHINESE                        |         |         | het =/del   |
| NA17063*2  | MEXICAN                        |         |         | het =/del   |
| NA17068*A2 | MEXICAN                        |         |         | het =/del   |
| NA17698*1  | MEXICAN-AMERICAN               |         |         | het =/del   |
| NA17086*2  | SOUTHEAST ASIANS               |         |         | het =/del   |
| NA07348*F1 | <u>CEPH/UTAH PEDIGREE 1345</u> |         |         | hom =/=     |
| NA17020*A1 | CHINESE (VERSION 1)            |         |         | hom =/=     |
| NA17029*1  | INDO PAKISTANI                 |         |         | hom =/=     |
| NA10495*B1 | MBUTI PYGMY POPULATION         |         |         | hom =/=     |
| NA17064*A2 | MEXICAN                        |         |         | hom =/=     |
| NA13619*2  | RUSSIAN - KRASNODAR            |         |         | hom =/=     |
| NA17312*2  | SOUTH AMERICA                  |         |         | hom =/=     |
| NA13610*2  | AMI POPULATION                 |         |         | hom del/del |
| NA13608*2  | <u>AMI POPULATION</u>          |         |         | hom del/del |
| NA10493*A1 | MBUTI PYGMY POPULATION         |         |         | hom del/del |
| NA17448*2  | MEXICAN-AMERICAN               |         |         | hom del/del |
| NA17684*1  | MEXICAN-AMERICAN               |         |         | hom del/del |
| NA17077*A1 | PUERTO RICAN                   |         |         | hom del/del |

---

#### File S4

##### Evidence of Two Major Haplotypes of *NANOG* Throughout Human Populations Worldwide, and Intragenic Recombination Between Haplotypes

Sequences we obtained of *NANOG* exon 4 from 94 geographically diverse individuals revealed two highly polymorphic synonymous substitution variants, *c.531C>T* and *c.798C>T*, in the reading frame. In both cases, C is ancestral and T derived. In *NANOGP8*, the ancestral nucleotides at both positions were homozygous in all 94 individuals, evidence that the parent allele of *NANOG* at the time of *NANOGP8*'s origin carried the ancestral nucleotides at both sites. We were able to distinguish homozygotes and heterozygotes for these two substitution polymorphisms in all 94 individuals tested, and compared them to the genotypes previously determined for the *\*552–\*573del* deletion. As shown in Table S4, of the 27 possible genotypes for these three polymorphisms, only nine were observed.

Hereafter, and in Table S4, we denote haplotypes for these variants as abbreviations in accordance with current human haplotype nomenclature (<http://www.hgvs.org/mutnomen>) as follows: For positions *c.531* and *c.798*, the nucleotide is listed (C or T). For position *c.\*552–\*573*, = denotes the ancestral non-deleted sequence, and *del* the derived deleted sequence. Semicolons separate variants at these three sites in their respective order.

Haplotypes could be conclusively identified only in triple homozygotes and individuals heterozygous for one of the three variants, a total of 51 individuals. The two most prevalent haplotypes are the reciprocal haplotypes *T; C; del* and *C; T; =*, which, respectively, are the two haplotypes in the current primary and alternate genomic assemblies of *NANOG*. The third most frequent haplotype is *T; C; =*, which probably arose through intragenic recombination between the two most prevalent haplotypes. Its reciprocal haplotype, *C; T; del*, also an apparent intragenic recombinant, is rare in the samples we examined, confirmed to be present in the heterozygous condition in five individuals. Only one individual (from the Africans South of the Sahara panel) carries as a heterozygote the fifth haplotype, *C; C; del*, which is the ancestral parent haplotype of *NANOGP8*. As shown in Table S4, double and triple heterozygotes could best be explained as genotypes heterozygous for the four most prevalent haplotypes; alternative genotypes for double and triple heterozygotes require the *T; T; =* or *T; T; del* haplotypes, which were not observed in any triple homozygotes or single heterozygotes.

Minor allele frequencies (MAFs) in the *NANOG* NCBI dbSNP report for five variants in the reading frame (*c.165C>T*, *c.246T>G*, *c.276G>A*, *c.531C>T*, and *c.798C>T*) are essentially equal, ranging from 0.3768 to 0.3863. In all five cases, the minor allele (two of which are ancestral and three derived) is the nucleotide present in the alternate

reference assembly, which corresponds to haplotype *C; T; =* in our sequences. Also, for each of these five variants, the major allele is the nucleotide present in the primary reference assembly (three ancestral and two derived), which corresponds to haplotype *T; C; del* in our sequences. These observations suggest that the *NANOG* sequences in the primary and alternate assemblies represent two major haplotypes that differ by five substitution variants within the reading frame. They correspond, respectively, to alleles *a* and *b* of *NANOG* identified by Zbiden *et al.* (2010). We used the reading-frame sequence of the primary and alternate assemblies of *NANOG* as a query for MEGABLAST searches (using default parameters) against the human EST database and identified 21 ESTs with 98% or greater similarity spanning at least two of these variant sites. Fifteen of these ESTs had a sequence consistent with the primary-assembly haplotype and six with the alternate-assembly haplotype, with no identifiable intragenic recombinants within the reading frame, further evidence of two prevalent haplotypes for *NANOG*.

**Table S4 A. Observed genotypes and inferred haplotypes in *NANOG* for the *c.531C>T*, *c.798C>T*, and *\*552-<sup>\*</sup>573del* derived variants and their ancestral counterparts (=).**

| <b>Observed Genotype</b>                     | <b>Number of<br/>Individuals</b> | <b>Inferred<br/>Haplotypes</b>             |
|----------------------------------------------|----------------------------------|--------------------------------------------|
| Triple homozygote <i>C/C; T/T; =/=</i>       | 20                               | <i>C; T; =</i>                             |
| Triple homozygote <i>T/T; C/C; del/del</i>   | 13                               | <i>T; C; del</i>                           |
| Triple homozygote <i>T/T; C/C; =/=</i>       | 5                                | <i>T; C; =</i>                             |
| Single heterozygote <i>T/T; C/C; =/del</i>   | 11                               | <i>T; C; =/T; C; del</i>                   |
| Single heterozygote <i>C/C; T/T; =/del</i>   | 1                                | <i>C; T; =/C; T; del</i>                   |
| Single heterozygote <i>C/C; C/T; del/del</i> | 1                                | <i>C; T; del/C; C; del</i>                 |
| Double heterozygote <i>C/T; C/T; =/=</i>     | 9                                | <i>C; T; =/T; C; =</i> (most probable)     |
| Double heterozygote <i>C/T; C/T; del/del</i> | 3                                | <i>T; C; del/C; T; del</i> (most probable) |
| Triple heterozygote <i>C/T; C/T; =/del</i>   | 31                               | <i>C; T; =/T; C; del</i> (most probable)   |
| <b>Total</b>                                 | <b>94</b>                        |                                            |

## B. Number and frequency of chromosomes with inferred haplotypes

---

| Haplotype                                            | Number of<br>Chromosomes | Frequency |
|------------------------------------------------------|--------------------------|-----------|
| <i>C; T; =</i> (major haplotype, alternate assembly) | 81                       | 0.4309    |
| <i>T; C; del</i> (major haplotype, primary assembly) | 71                       | 0.3777    |
| <i>T; C; =</i> (recombinant haplotype)               | 30                       | 0.1596    |
| <i>C; T; del</i> (recombinant haplotype)             | 5                        | 0.0266    |
| <i>C; C; del</i> (ancestral haplotype)               | 1                        | 0.0053    |

---

**An Analysis of Previously Published Efforts to Distinguish RT-PCR Products Derived from *NANOG* and *NANOGP8* in Cancer Cells**

Because both *NANOG* and *NANOGP8* may be transcriptionally active in cancer cells, accurate distinction of their RT-PCR products is essential for gene-expression research. The genomic differences between *NANOG* and *NANOGP8* are considerably greater than those in RT-PCR products, due to the presence of introns in *NANOG* and their absence in *NANOGP8*, and different flanking sequences at the genomic borders of *NANOG* and *NANOGP8* the insertion boundaries of *NANOGP8*. Ultimately, RT-PCR products must be distinguished based on variants within the mRNA that differ between the two in the cell cultures under study. Researchers who have studied differential expression of *NANOG* and *NANOGP8* in cancer cells have relied on a variety of differences between *NANOG* and *NANOGP8* sequences in genomic reference assemblies for experimental distinction of RT-PCR products. According to our experimental results, however, differences in reference assemblies may be unreliable because they may represent modern polymorphisms present in a subset of individuals.

Zhang et al. (2006) published the first evidence that *NANOGP8* is a retrogene expressed in cancer cells. They utilized primers capable of amplifying RT-PCR products from both *NANOG* and *NANOGP8*, but distinguished the two through sequencing the reading frame of their RT-PCR products. The sequences they identified as belonging to *NANOGP8* contained variants we identified as evidently fixed in *NANOGP8* (*c.144G>A* and *c.759G>C*), confirming the accuracy of their identifications. Likewise, Zhang et al. (2010) and Uchino et al. (2012) utilized primers capable of amplifying RT-PCR products from both *NANOG* and *NANOGP8* and sequenced their RT-PCR products confirming their correct identities.

Jeter et al. (2009, 2011), Ma et al. (2010, 2012), and Ibrahim et al. (2012) relied on the 22-nucleotide pair deletion in the 3' UTR of *NANOGP8* (*c.\*552\_\*573del*) as a site for primers and probes to distinguish *NANOG* from *NANOGP8* qRT-PCR products, presuming this deletion to be unique to *NANOGP8* based on an earlier human genome reference assembly. Our results demonstrate that this deletion is uniformly present in *NANOGP8* but highly polymorphic in *NANOG*. Its use as a primer-binding site for RT-PCR should result in reliable amplification of *NANOGP8* fragments but may also result in amplification of fragments of identical size from *NANOG*, if *NANOG* is transcribed in those

cells and if the cells are from individuals who carry the *c.\*552\_\*573del* allele of *NANOG* (a majority of individuals according to our results). Jeter et al. (2009) and Ibrahim *et al.* (2012) sequenced RT-PCR products they obtained, confirming the correct identifications of these products as belonging to *NANOGP8* or *NANOG* on the basis of reading-frame variants that, according to our research, are evidently fixed. There is no indication of sequencing to confirm correct identification of RT-PCR products in other studies utilizing *c.\*552\_\*573del* as primer-binding site (Jeter et al. 2011, Ma et al. 2010, 2012).

Ambady et al. (2010) relied on a *SmaI* RFLP generated by a derived substitution variant in the 3' UTR (*c.\*313C>G*) to distinguish *NANOG* and *NANOGP8* RT-PCR products, presuming the *SmaI* site to be unique to *NANOG* based on reference-sequence comparison. Our results, however, demonstrate that the ancestral *SmaI* site and the derived variant in *NANOGP8* that alters the site to create the RFLP are highly polymorphic in *NANOGP8*, rendering this RFLP unreliable for distinguishing *NANOG* and *NANOGP8* RT-PCR products. However, Ambady et al. (2010) sequenced the RT-PCR products they obtained, confirming their correct identity as *NANOGP8*.

Zbinden et al. (2010) sequenced a region they referred to as “a diagnostic 3' UTR region, which varies among the *NANOG* alleles and *NANOGP8*” (p. 2660), based on their comparison of reference sequences. However, they did not specify which variants they considered as diagnostic. According to our results, all variants in the 3' UTR are modern polymorphisms in either *NANOG* or *NANOGP8*, except *\*606T>G* in *NANOGP8*, which we could not confirm as fixed or polymorphic.

Eberle et al. (2010) utilized RT-PCR to detect *NANOG* transcripts in acute leukemic human cell lines, and concluded that *NANOGP8* was not expressed in these cells. Their conclusion was based on two primer pairs (which they named set a and set b) presumed to amplify fragments from transcripts of both *NANOG* and *NANOGP8*, as well as other *NANOG* pseudogenes. They sequenced the RT-PCR products from these primer pairs but did not state which variants they considered to be reliable identifiers of *NANOG* and *NANOGP8*. One of their primer pairs (set a) should have amplified fragments of identical size from both *NANOG* and *NANOGP8* transcripts, consisting of most of the reading frame. The reverse primer of the other pair (set b), however, had on its 3' end the ancestral G at site *c.759*, which is present in *NANOG*, but altered in *NANOGP8* by the *c.759G>C* fixed variant. Therefore, this primer pair should have successfully amplified fragments from *NANOG* but not *NANOGP8*. To confirm their conclusion that *NANOGP8* was not expressed in these cells, they utilized a third primer pair they considered to be exclusive to *NANOGP8*, and detected no amplification in any of 60 clones from a single cell line. This primer pair, however, relied on the *c.47C>A* variant on the 3' end of the forward primer for exclusive amplification of *NANOGP8*. Although this derived variant is present in both the current primary and alternate reference assemblies of *NANOGP8*, our results, as well as those of Jeter et al. (2009) and Uchino et al. (2012), show it to be polymorphic



and rare in *NANOGP8*. Moreover, the reverse primer in this pair had the derived T in the *c.531C>T* variant as the third nucleotide from the 3' end of the primer, which is absent in *NANOGP8* and polymorphic in *NANOG*, according to our sequences. Therefore, this primer pair, considered to be *NANOGP8*-specific, is not likely to amplify fragments from either *NANOGP8* or *NANOG* in most individuals, and may explain the lack of amplification observed. Beyond these issues for *NANOGP8* identification, the results of Eberle et al. (2010) are highly pertinent in that alternative splicing of transcripts from *NANOG* and *NANOGP1* was well documented in these cell lines.

Ishiguro et al. (2012) relied on an RFLP resulting from the *c.144G>A* variant in *NANOGP8* to distinguish *NANOG* and *NANOGP8* RT-PCR products. Our data suggest that this is a reliable variant due to evident fixation of the ancestral allele in *NANOG* and the derived allele in *NANOGP8*.

Our observations of widespread modern polymorphisms in *NANOG* and *NANOGP8* underscore the unreliability of variants between reference sequences for accurate experimental identification of RT-PCR products. Instead, the most reliable method to distinguish *NANOG* from *NANOGP8* RT-PCR products is to sequence genomic-DNA specific to *NANOG* and *NANOGP8* from the cell lines being researched to identify which variants distinguish the two in any particular cell line, then use those variants to accurately identify sequenced RT-PCR products for each line. Several of the primer pairs we used (see Table 1 in the main text of the article) are capable of generating PCR fragments specific to *NANOG* or *NANOGP8* from genomic DNA (albeit not from mRNA for RT-PCR), and may be useful for such genomic-DNA sequencing.
