# Supplementary material for: NANOGP8: Evolution of a Human-Specific Retro-Oncogene
Source: PubMed Central journal article supplement (PMC3484675; doi:10.1534/g3.112.004366), 2012-11-01
Supplement: supp_2.11.1447_FileS1.pdf [file supp_2.11.1447_FileS1.pdf]

File S1

**Table S1** Genotypes at ten single-nucleotide substitution variant positions in *NANOGP8* from cloned DNA obtained from 10 geographically diverse individuals. For all but one individual (NA07038\*D2), two clones were sequenced; the nucleotide in clone 1 is listed first, and the nucleotide in clone 2 listed second. Variants with a frequency of zero are variants identified in previous studies but not present in the sequences we examined.

| Coriell ID<br>for DNA           | Population                   | Nucleotide at Variant Positions in Coding Sequence |      |      |      |      |      |      |      |      |      |
|---------------------------------|------------------------------|----------------------------------------------------|------|------|------|------|------|------|------|------|------|
|                                 |                              | -135                                               | 47   | 190  | 552  | 629  | 754  | *7   | *44  | *313 | *315 |
| NA17347*3                       | AFRICANS SOUTH OF THE SAHARA | T T                                                | C C  | G G  | A A  | C C  | A A  | G G  | G G  | C C  | T T  |
| NA17344*A1                      | AFRICANS SOUTH OF THE SAHARA | T T                                                | C C  | G G  | A A  | T C  | A A  | G G  | G G  | C C  | T T  |
| NA10472*A2                      | BIAKA PYGMY POPULATION       | T C                                                | C C  | G G  | A A  | T C  | A A  | A G  | G G  | C C  | C C  |
| NA07038*D2                      | CEPH/UTAH PEDIGREE 1333      | T                                                  | C    | G    | A    | C    | A    | G    | G    | C    | C    |
| NA11521*3                       | DRUZE POPULATION             | T T                                                | C A  | G G  | A A  | T C  | A A  | A G  | G G  | C C  | C C  |
| NA17030*1                       | INDO PAKISTANI               | T T                                                | C C  | T T  | G G  | C C  | A A  | G G  | G G  | C C  | C C  |
| NA10492*A2                      | MBUTI PYGMY POPULATION       | T T                                                | C C  | G G  | A A  | C C  | A A  | G G  | A G  | C C  | C T  |
| NA10496*A3                      | MBUTI PYGMY POPULATION       | T T                                                | C C  | G G  | A A  | C C  | A A  | G G  | G G  | C C  | T T  |
| NA17387*1                       | PACIFIC                      | C T                                                | C C  | G T  | A G  | C C  | A A  | G G  | G G  | C C  | C C  |
| NA13618*2                       | RUSSIAN - KRASNODAR          | T T                                                | C C  | G G  | A A  | C C  | A A  | G G  | G G  | C C  | T T  |
| Frequency of Derived Nucleotide |                              | 0.11                                               | 0.05 | 0.16 | 0.16 | 0.16 | 0.00 | 0.11 | 0.05 | 0.00 | 0.47 |
