# Supplementary material for: NANOGP8: Evolution of a Human-Specific Retro-Oncogene
Source: PubMed Central journal article supplement (PMC3484675; doi:10.1534/g3.112.004366), 2012-11-01
Supplement: supp_2.11.1447_FileS2.pdf [file supp_2.11.1447_FileS2.pdf]

## File S2

Table S2 Genotypes at six variant positions in *NANOGP8* from single-pass sequences in exon 4 from 94 geographically diverse individuals

| Coriell ID<br>for DNA<br>Sample | Population                   | Genotype at Variant Positions in Coding Sequence |         |         |            |         |         |
|---------------------------------|------------------------------|--------------------------------------------------|---------|---------|------------|---------|---------|
|                                 |                              | 552                                              | 629     | 754     | 916–917    | *7      | *44     |
| NA17347*3                       | AFRICANS SOUTH OF THE SAHARA | hom A/A                                          | hom C/C | hom A/A | hom TG/TG  | hom G/G | hom G/G |
| NA17344*A1                      | AFRICANS SOUTH OF THE SAHARA | hom A/A                                          | het C/T | hom A/A | hom TG/TG  | hom A/A | hom G/G |
| NA10472*A2                      | BIAKA PYGMY POPULATION       | hom A/A                                          | het C/T | hom A/A | hom TG/TG  | het G/A | hom G/G |
| NA07038*D2                      | CEPH/UTAH PEDIGREE 1333      | hom A/A                                          | hom C/C | het A/C | het TG/del | hom G/G |         |
| NA10492*A2                      | MBUTI PYGMY POPULATION       | hom A/A                                          | hom C/C | hom A/A | hom TG/TG  | hom G/G | het G/A |
| NA10496*A3                      | MBUTI PYGMY POPULATION       | hom A/A                                          | hom C/C | hom A/A | hom TG/TG  | hom G/G | hom G/G |
| NA17387*1                       | PACIFIC                      | het A/G                                          | hom C/C | hom A/A | hom TG/TG  | hom G/G | hom G/G |
| NA13618*2                       | RUSSIAN - KRASNODAR          | hom A/A                                          | hom C/C | hom A/A | hom TG/TG  | hom G/G | hom G/G |
| NA17348*1                       | AFRICANS SOUTH OF THE SAHARA | hom A/A                                          | hom C/C | hom A/A | hom TG/TG  | hom G/G | het G/A |
| NA17343*1                       | AFRICANS SOUTH OF THE SAHARA | hom A/A                                          | hom C/C | hom A/A | hom TG/TG  | hom G/G | het G/A |
| NA10473*A3                      | BIAKA PYGMY POPULATION       | hom A/A                                          | hom C/C | hom A/A | hom TG/TG  | hom G/G | het G/A |
| NA17033*1                       | AFRICAN AMERICAN             | hom A/A                                          | hom C/C | hom A/A | hom TG/TG  | hom G/G | hom A/A |
| NA17172*A1                      | AFRICAN AMERICAN             | hom A/A                                          | het C/T | het A/C | het TG/del | het G/A |         |
| NA17161*A2                      | AFRICAN AMERICAN             | hom A/A                                          | het C/T | hom A/A | hom TG/TG  | het G/A | hom G/G |
| NA17062*A1                      | MEXICAN                      | hom A/A                                          | het C/T | hom A/A | hom TG/TG  | het G/A | hom G/G |
| NA17036*A1                      | AFRICAN AMERICAN             | hom A/A                                          | het C/T | hom A/A | hom TG/TG  | hom A/A | hom G/G |
| NA13617*1                       | RUSSIAN - KRASNODA           | hom A/A                                          | het C/T | hom A/A | hom TG/TG  | hom A/A | hom G/G |
| NA17032*A1                      | AFRICAN AMERICAN             | hom A/A                                          | het C/T | hom A/A | hom TG/TG  | hom A/A | hom G/G |

|            |                              |         |         |         |           |         |         |
|------------|------------------------------|---------|---------|---------|-----------|---------|---------|
| NA10470*A3 | BIAKA PYGMY POPULATION       | hom A/A | het C/T | hom A/A | hom TG/TG | hom A/A | hom G/G |
| NA17342*2  | AFRICANS SOUTH OF THE SAHARA | hom A/A | hom C/C | hom A/A | hom TG/TG | hom A/A | hom G/G |
| NA13609*1  | AMI POPULATION               | hom A/A | hom T/T | hom A/A | hom TG/TG | hom A/A | hom G/G |
| NA17636*1  | MEXICAN-AMERICAN             | hom A/A | hom T/T | hom A/A | hom TG/TG | hom A/A | hom G/G |
| NA17341*2  | AFRICANS SOUTH OF THE SAHARA | hom A/A | hom T/T | hom A/A | hom TG/TG | hom A/A | hom G/G |
| NA17057*4  | JAPANESE                     | hom A/A | hom T/T | hom A/A | hom TG/TG | hom A/A | hom G/G |
| NA17028*2  | INDO PAKISTANI               | het A/G | hom C/C | hom A/A | hom TG/TG | hom G/G | hom G/G |
| NA17317*A1 | SOUTH AMERICA                | het A/G | hom C/C | hom A/A | hom TG/TG | hom G/G | hom G/G |
| NA17076*2  | PUERTO RICAN                 | het A/G | hom C/C | hom A/A | hom TG/TG | hom G/G | hom G/G |
| NA17065*A5 | MEXICAN                      | het A/G | hom C/C | hom A/A | hom TG/TG | hom G/G | hom G/G |
| NA10849*5  | CEPH/UTAH PEDIGREE 1332      | het A/G | hom C/C | hom A/A | hom TG/TG | hom G/G | hom G/G |
| NA12911*2  | CEPH/UTAH PEDIGREE 1582      | het A/G | hom C/C | hom A/A | hom TG/TG | hom G/G | hom G/G |
| NA17313*A1 | SOUTH AMERICA                | het A/G | hom C/C | hom A/A | hom TG/TG | hom G/G | hom G/G |
| NA17040*A1 | AFRICAN AMERICAN             | hom A/A | hom C/C | hom A/A | hom TG/TG | hom G/G | hom G/G |
| NA17039*1  | AFRICAN AMERICAN             | hom A/A | hom C/C | hom A/A | hom TG/TG | hom G/G | hom G/G |
| NA17037*1  | AFRICAN AMERICAN             | hom A/A | hom C/C | hom A/A | hom TG/TG | hom G/G | hom G/G |
| NA17166*A1 | AFRICAN AMERICAN             | hom A/A | hom C/C | hom A/A | hom TG/TG | hom G/G | hom G/G |
| NA17345*2  | AFRICANS SOUTH OF THE SAHARA | hom A/A | hom C/C | hom A/A | hom TG/TG | hom G/G | hom G/G |
| NA17346*2  | AFRICANS SOUTH OF THE SAHARA | hom A/A | hom C/C | hom A/A | hom TG/TG | hom G/G | hom G/G |
| NA07057*D2 | CEPH/UTAH PEDIGREE 1331      | hom A/A | hom C/C | hom A/A | hom TG/TG | hom G/G | hom G/G |
| NA10858*B1 | CEPH/UTAH PEDIGREE 1347      | hom A/A | hom C/C | hom A/A | hom TG/TG | hom G/G | hom G/G |
| NA11993*C1 | CEPH/UTAH PEDIGREE 1362      | hom A/A | hom C/C | hom A/A | hom TG/TG | hom G/G | hom G/G |
| NA12909*2  | CEPH/UTAH PEDIGREE 1477      | hom A/A | hom C/C | hom A/A | hom TG/TG | hom G/G | hom G/G |
| NA17710*1  | MEXICAN-AMERICAN             | hom A/A | hom C/C | hom A/A | hom TG/TG | hom G/G | hom G/G |
| NA17443*2  | MEXICAN-AMERICAN             | hom A/A | hom C/C | hom A/A | hom TG/TG | hom G/G | hom G/G |
| NA18460*1  | NOT IDENTIFIED               | hom A/A | hom C/C | hom A/A | hom TG/TG | hom G/G | hom G/G |

|            |                         |         |         |         |           |         |         |
|------------|-------------------------|---------|---------|---------|-----------|---------|---------|
| NA17072*A1 | PUERTO RICAN            | hom A/A | hom C/C | hom A/A | hom TG/TG | hom G/G | hom G/G |
| NA17071*A2 | PUERTO RICAN            | hom A/A | hom C/C | hom A/A | hom TG/TG | hom G/G | hom G/G |
| NA17314*2  | SOUTH AMERICA           | hom A/A | hom C/C | hom A/A | hom TG/TG | hom G/G | hom G/G |
| NA17088*2  | SOUTHEAST ASIANS        | hom A/A | hom C/C | hom A/A | hom TG/TG | hom G/G | hom G/G |
| NA12273*B2 | CEPH/UTAH PEDIGREE 1418 | hom A/A | hom C/C | hom A/A | hom TG/TG | hom G/G | hom G/G |
| NA11522*4  | DRUZE POPULATION        | hom A/A | hom C/C | hom A/A | hom TG/TG | hom G/G | hom G/G |
| NA11524*3  | DRUZE POPULATION        | hom A/A | hom C/C | hom A/A | hom TG/TG | hom G/G | hom G/G |
| NA17066*2  | MEXICAN                 | hom A/A | hom C/C | hom A/A | hom TG/TG | hom G/G | hom G/G |
| NA17634*1  | MEXICAN-AMERICAN        | hom A/A | hom C/C | hom A/A | hom TG/TG | hom G/G | hom G/G |
| NA17311*A5 | SOUTH AMERICA           | hom A/A | hom C/C | hom A/A | hom TG/TG | hom G/G | hom G/G |
| NA06990*F1 | CEPH/UTAH PEDIGREE 1331 | hom A/A | hom C/C | hom A/A | hom TG/TG | hom G/G | hom G/G |
| NA17017*5  | CHINESE (VERSION 1)     | hom A/A | hom C/C | hom A/A | hom TG/TG | hom G/G | hom G/G |
| NA17016*3  | CHINESE (VERSION 1)     | hom A/A | hom C/C | hom A/A | hom TG/TG | hom G/G | hom G/G |
| NA17058*3  | JAPANESE                | hom A/A | hom C/C | hom A/A | hom TG/TG | hom G/G | hom G/G |
| NA17060*3  | JAPANESE                | hom A/A | hom C/C | hom A/A | hom TG/TG | hom G/G | hom G/G |
| NA17391*2  | PACIFIC                 | hom A/A | hom C/C | hom A/A | hom TG/TG | hom G/G | hom G/G |
| NA10832*3  | CEPH/UTAH PEDIGREE 1413 | hom A/A | hom C/C | hom A/A | hom TG/TG | hom G/G | hom G/G |
| NA17389*2  | PACIFIC                 | hom A/A | hom C/C | hom A/A | hom TG/TG | hom G/G | hom G/G |
| NA17388*1  | PACIFIC                 | hom A/A | hom C/C | hom A/A | hom TG/TG | hom G/G | hom G/G |
| NA17073*A1 | PUERTO RICAN            | hom A/A | hom C/C | hom A/A | hom TG/TG | hom G/G | hom G/G |
| NA17056*B2 | JAPANESE                | hom A/A | hom C/C | hom A/A | hom TG/TG | hom G/G | hom G/G |
| NA10494*A3 | MBUTI PYGMY POPULATION  | hom A/A | hom C/C | hom A/A | hom TG/TG | hom G/G | hom G/G |
| NA17700*1  | MEXICAN-AMERICAN        | hom A/A | hom C/C | hom A/A | hom TG/TG | hom G/G | hom G/G |
| NA17075*2  | PUERTO RICAN            | hom A/A | hom C/C | hom A/A | hom TG/TG | hom G/G | hom G/G |
| NA17074*3  | PUERTO RICAN            | hom A/A | hom C/C | hom A/A | hom TG/TG | hom G/G | hom G/G |
| NA17315*1  | SOUTH AMERICA           | hom A/A | hom C/C | hom A/A | hom TG/TG | hom G/G | hom G/G |

|                                 |                              |         |         |         |            |         |         |
|---------------------------------|------------------------------|---------|---------|---------|------------|---------|---------|
| NA17087*2                       | SOUTHEAST ASIANS             | hom A/A | hom C/C | hom A/A | hom TG/TG  | hom G/G | hom G/G |
| NA17316*2                       | SOUTH AMERICA                | hom A/A | hom C/C | hom A/A | hom TG/TG  | hom G/G | hom G/G |
| NA17167*2                       | AFRICAN AMERICAN             | hom A/A | hom C/C | hom A/A | hom TG/TG  | hom G/G | hom G/G |
| NA07349*B1                      | CEPH/UTAH PEDIGREE 1345      | hom A/A | hom C/C | hom A/A | hom TG/TG  | hom G/G | hom G/G |
| NA10860*B1                      | CEPH/UTAH PEDIGREE 1362      | hom A/A | hom C/C | hom A/A | hom TG/TG  | hom G/G | hom G/G |
| NA10831*A7                      | CEPH/UTAH PEDIGREE 1408      | hom A/A | hom C/C | hom A/A | hom TG/TG  | hom G/G | hom G/G |
| NA10833*4                       | CEPH/UTAH PEDIGREE 1413      | hom A/A | hom C/C | hom A/A | hom TG/TG  | hom G/G | hom G/G |
| NA12813*5                       | CEPH/UTAH PEDIGREE 1454      | hom A/A | hom C/C | hom A/A | hom TG/TG  | hom G/G | hom G/G |
| NA12841*3                       | CEPH/UTAH PEDIGREE 1458      | hom A/A | hom C/C | hom A/A | hom TG/TG  | hom G/G | hom G/G |
| NA11523*3                       | DRUZE POPULATION             | hom A/A | hom C/C | hom A/A | hom TG/TG  | hom G/G | hom G/G |
| NA11525*3                       | DRUZE POPULATION             | hom A/A | hom C/C | hom A/A | hom TG/TG  | hom G/G | hom G/G |
| NA17067*A1                      | MEXICAN                      | hom A/A | hom C/C | hom A/A | hom TG/TG  | hom G/G | hom G/G |
| NA17701*2                       | MEXICAN-AMERICAN             | hom A/A | hom C/C | hom A/A | hom TG/TG  | hom G/G | hom G/G |
| NA13611*2                       | AMI POPULATION               | hom G/G | hom C/C | hom A/A | hom TG/TG  | hom G/G | hom G/G |
| NA13607*5                       | AMI POPULATION               | hom G/G | hom C/C | hom A/A | hom TG/TG  | hom G/G | hom G/G |
| NA17349*3                       | AFRICANS SOUTH OF THE SAHARA | hom A/A | hom T/T | hom A/A | hom TG/TG  | hom G/G | hom G/G |
| NA06987*D6                      | CEPH/UTAH PEDIGREE 1333      | hom A/A | hom C/C | hom C/C | hom del    | hom G/G | hom G/G |
| NA17158*3                       | AFRICAN AMERICAN             | hom A/A | hom C/C | hom C/C | hom del    | hom G/G | hom G/G |
| NA17035*A1                      | AFRICAN AMERICAN             | hom A/A | het C/T | het A/C | het TG/del | het G/A |         |
| NA17038*A1                      | AFRICAN AMERICAN             | hom A/A | het C/T | het A/C | het TG/del | het G/A |         |
| NA17061*A3                      | MEXICAN                      | hom A/A | hom C/C | het A/C | het TG/del | hom G/G |         |
| NA17034*A2                      | AFRICAN AMERICAN             | hom A/A | hom C/C | het A/C | het TG/del | hom G/G |         |
| NA17078*1                       | PUERTO RICAN                 | hom A/A | hom C/C | het A/C | het TG/del | hom G/G |         |
| NA10861*B3                      | CEPH/UTAH PEDIGREE 1362      | het A/G | hom C/C | hom A/A | het TG/del | hom G/G |         |
| Frequency of Derived Nucleotide |                              | 0.07    | 0.11    | 0.06    | 0.06       | 0.14    | 0.03    |
