# Supplementary material for: NANOGP8: Evolution of a Human-Specific Retro-Oncogene
Source: PubMed Central journal article supplement (PMC3484675; doi:10.1534/g3.112.004366), 2012-11-01
Supplement: supp_2.11.1447_FileS3.pdf [file supp_2.11.1447_FileS3.pdf]

File S3

**Table S3** Genotypes at two single-nucleotide substitution variant positions in *NANOG* from single-pass sequences in exon 4 from 94 geographically diverse individuals, and genotypes for the 22 bp deletion at position \*552–\*573, as determined by PCR analysis in 119 geographically diverse individuals.

| Coriell ID<br>for DNA<br>Sample | Population                   | Genotype at Variant Positions in Coding Sequence |         |             |
|---------------------------------|------------------------------|--------------------------------------------------|---------|-------------|
|                                 |                              | 531                                              | 798     | *552–*573   |
| NA17347*3                       | AFRICANS SOUTH OF THE SAHARA | het C/T                                          | het C/T | het =/del   |
| NA17344*A1                      | AFRICANS SOUTH OF THE SAHARA | hom C/C                                          | het C/T | hom del/del |
| NA10472*A2                      | BIAKA PYGMY POPULATION       | hom T/T                                          | hom C/C | hom del/del |
| NA07038*D2                      | CEPH/UTAH PEDIGREE 1333      | hom C/C                                          | hom T/T | hom =/=     |
| NA11521*3                       | DRUZE POPULATION             |                                                  |         | hom =/=     |
| NA17030*1                       | INDO PAKISTANI               |                                                  |         | hom =/=     |
| NA10492*A2                      | MBUTI PYGMY POPULATION       | hom C/C                                          | hom T/T | hom =/=     |
| NA10496*A3                      | MBUTI PYGMY POPULATION       | hom T/T                                          | hom C/C | het =/del   |
| NA17387*1                       | PACIFIC                      | hom T/T                                          | hom C/C | hom =/=     |
| NA13618*2                       | RUSSIAN - KRASNODAR          | het C/T                                          | het C/T | hom =/=     |
| NA17348*1                       | AFRICANS SOUTH OF THE SAHARA | het C/T                                          | het C/T | het =/del   |
| NA17343*1                       | AFRICANS SOUTH OF THE SAHARA | het C/T                                          | het C/T | het =/del   |
| NA10473*A3                      | BIAKA PYGMY POPULATION       | het C/T                                          | het C/T | het =/del   |
| NA17033*1                       | AFRICAN AMERICAN             | het C/T                                          | het C/T | het =/del   |
| NA17172*A1                      | AFRICAN AMERICAN             | het C/T                                          | het C/T | het =/del   |
| NA17161*A2                      | AFRICAN AMERICAN             | hom T/T                                          | hom C/C | hom del/del |
| NA17062*A1                      | MEXICAN                      | hom C/C                                          | hom T/T | hom =/=     |

|            |                              |         |         |             |
|------------|------------------------------|---------|---------|-------------|
| NA17036*A1 | AFRICAN AMERICAN             | het C/T | het C/T | het =/del   |
| NA13617*1  | RUSSIAN - KRASNODA           | het C/T | het C/T | het =/del   |
| NA17032*A1 | AFRICAN AMERICAN             | hom T/T | hom C/C | hom del/del |
| NA10470*A3 | BIAKA PYGMY POPULATION       | hom C/C | hom T/T | hom =/=     |
| NA17342*2  | AFRICANS SOUTH OF THE SAHARA | het C/T | het C/T | het =/del   |
| NA13609*1  | AMI POPULATION               | het C/T | het C/T | het =/del   |
| NA17636*1  | MEXICAN-AMERICAN             | het C/T | het C/T | het =/del   |
| NA17341*2  | AFRICANS SOUTH OF THE SAHARA | het C/T | het C/T | hom del/del |
| NA17057*4  | JAPANESE                     | hom T/T | hom C/C | het =/del   |
| NA17028*2  | INDO PAKISTANI               | het C/T | het C/T | hom =/=     |
| NA17317*A1 | SOUTH AMERICA                | het C/T | het C/T | hom =/=     |
| NA17076*2  | PUERTO RICAN                 | het C/T | het C/T | hom del/del |
| NA17065*A5 | MEXICAN                      | hom T/T | hom C/C | het =/del   |
| NA10849*5  | CEPH/UTAH PEDIGREE 1332      | hom C/C | hom T/T | hom =/=     |
| NA12911*2  | CEPH/UTAH PEDIGREE 1582      | hom C/C | hom T/T | hom =/=     |
| NA17313*A1 | SOUTH AMERICA                | hom C/C | hom T/T | hom =/=     |
| NA17040*A1 | AFRICAN AMERICAN             | het C/T | het C/T | het =/del   |
| NA17039*1  | AFRICAN AMERICAN             | het C/T | het C/T | het =/del   |
| NA17037*1  | AFRICAN AMERICAN             | het C/T | het C/T | het =/del   |
| NA17166*A1 | AFRICAN AMERICAN             | het C/T | het C/T | het =/del   |
| NA17345*2  | AFRICANS SOUTH OF THE SAHARA | het C/T | het C/T | het =/del   |
| NA17346*2  | AFRICANS SOUTH OF THE SAHARA | het C/T | het C/T | het =/del   |
| NA07057*D2 | CEPH/UTAH PEDIGREE 1331      | het C/T | het C/T | het =/del   |
| NA10858*B1 | CEPH/UTAH PEDIGREE 1347      | het C/T | het C/T | het =/del   |
| NA11993*C1 | CEPH/UTAH PEDIGREE 1362      | het C/T | het C/T | het =/del   |
| NA12909*2  | CEPH/UTAH PEDIGREE 1477      | het C/T | het C/T | het =/del   |

|            |                         |         |         |             |
|------------|-------------------------|---------|---------|-------------|
| NA17710*1  | MEXICAN-AMERICAN        | het C/T | het C/T | het =/del   |
| NA17443*2  | MEXICAN-AMERICAN        | het C/T | het C/T | het =/del   |
| NA18460*1  | NOT IDENTIFIED          | het C/T | het C/T | het =/del   |
| NA17072*A1 | PUERTO RICAN            | het C/T | het C/T | het =/del   |
| NA17071*A2 | PUERTO RICAN            | het C/T | het C/T | het =/del   |
| NA17314*2  | SOUTH AMERICA           | het C/T | het C/T | het =/del   |
| NA17088*2  | SOUTHEAST ASIANS        | het C/T | het C/T | het =/del   |
| NA12273*B2 | CEPH/UTAH PEDIGREE 1418 | het C/T | het C/T | hom =/=     |
| NA11522*4  | DRUZE POPULATION        | het C/T | het C/T | hom =/=     |
| NA11524*3  | DRUZE POPULATION        | het C/T | het C/T | hom =/=     |
| NA17066*2  | MEXICAN                 | het C/T | het C/T | hom =/=     |
| NA17634*1  | MEXICAN-AMERICAN        | het C/T | het C/T | hom =/=     |
| NA17311*A5 | SOUTH AMERICA           | het C/T | het C/T | hom =/=     |
| NA06990*F1 | CEPH/UTAH PEDIGREE 1331 | hom T/T | hom C/C | het =/del   |
| NA17017*5  | CHINESE (VERSION 1)     | hom T/T | hom C/C | het =/del   |
| NA17016*3  | CHINESE (VERSION 1)     | hom T/T | hom C/C | het =/del   |
| NA17058*3  | JAPANESE                | hom T/T | hom C/C | het =/del   |
| NA17060*3  | JAPANESE                | hom T/T | hom C/C | het =/del   |
| NA17391*2  | PACIFIC                 | hom T/T | hom C/C | het =/del   |
| NA10832*3  | CEPH/UTAH PEDIGREE 1413 | hom T/T | hom C/C | hom =/=     |
| NA17389*2  | PACIFIC                 | hom T/T | hom C/C | hom =/=     |
| NA17388*1  | PACIFIC                 | hom T/T | hom C/C | hom =/=     |
| NA17073*A1 | PUERTO RICAN            | hom T/T | hom C/C | hom =/=     |
| NA17056*B2 | JAPANESE                | hom T/T | hom C/C | hom del/del |
| NA10494*A3 | MBUTI PYGMY POPULATION  | hom T/T | hom C/C | hom del/del |
| NA17700*1  | MEXICAN-AMERICAN        | hom T/T | hom C/C | hom del/del |

|            |                              |         |         |             |
|------------|------------------------------|---------|---------|-------------|
| NA17075*2  | PUERTO RICAN                 | hom T/T | hom C/C | hom del/del |
| NA17074*3  | PUERTO RICAN                 | hom T/T | hom C/C | hom del/del |
| NA17315*1  | SOUTH AMERICA                | hom T/T | hom C/C | hom del/del |
| NA17087*2  | SOUTHEAST ASIANS             | hom T/T | hom C/C | hom del/del |
| NA17316*2  | SOUTH AMERICA                | hom C/C | hom T/T | het =/del   |
| NA17167*2  | AFRICAN AMERICAN             | hom C/C | hom T/T | hom =/=     |
| NA07349*B1 | CEPH/UTAH PEDIGREE 1345      | hom C/C | hom T/T | hom =/=     |
| NA10860*B1 | CEPH/UTAH PEDIGREE 1362      | hom C/C | hom T/T | hom =/=     |
| NA10831*A7 | CEPH/UTAH PEDIGREE 1408      | hom C/C | hom T/T | hom =/=     |
| NA10833*4  | CEPH/UTAH PEDIGREE 1413      | hom C/C | hom T/T | hom =/=     |
| NA12813*5  | CEPH/UTAH PEDIGREE 1454      | hom C/C | hom T/T | hom =/=     |
| NA12841*3  | CEPH/UTAH PEDIGREE 1458      | hom C/C | hom T/T | hom =/=     |
| NA11523*3  | DRUZE POPULATION             | hom C/C | hom T/T | hom =/=     |
| NA11525*3  | DRUZE POPULATION             | hom C/C | hom T/T | hom =/=     |
| NA17067*A1 | MEXICAN                      | hom C/C | hom T/T | hom =/=     |
| NA17701*2  | MEXICAN-AMERICAN             | hom C/C | hom T/T | hom =/=     |
| NA13611*2  | AMI POPULATION               | hom T/T | hom C/C | het =/del   |
| NA13607*5  | AMI POPULATION               | hom T/T | hom C/C | hom del/del |
| NA17349*3  | AFRICANS SOUTH OF THE SAHARA | hom C/C | hom T/T | hom =/=     |
| NA06987*D6 | CEPH/UTAH PEDIGREE 1333      | het C/T | het C/T | het =/del   |
| NA17158*3  | AFRICAN AMERICAN             | hom C/C | hom T/T | hom =/=     |
| NA17035*A1 | AFRICAN AMERICAN             | het C/T | het C/T | hom del/del |
| NA17038*A1 | AFRICAN AMERICAN             | hom T/T | hom C/C | het =/del   |
| NA17061*A3 | MEXICAN                      | het C/T | het C/T | het =/del   |
| NA17034*A2 | AFRICAN AMERICAN             | hom T/T | hom C/C | hom del/del |
| NA17078*1  | PUERTO RICAN                 | hom T/T | hom C/C | hom del/del |

|            |                                |         |         |             |
|------------|--------------------------------|---------|---------|-------------|
| NA10861*B3 | <u>CEPH/UTAH PEDIGREE 1362</u> | het C/T | het C/T | het =/del   |
| NA10469*B1 | <u>BIAKA PYGMY POPULATION</u>  |         |         | het =/del   |
| NA10859*D3 | CEPH/UTAH PEDIGREE 1347        |         |         | het =/del   |
| NA12749*3  | CEPH/UTAH PEDIGREE 1444        |         |         | het =/del   |
| NA12912*3  | CEPH/UTAH PEDIGREE 1582        |         |         | het =/del   |
| NA17018*A2 | CHINESE                        |         |         | het =/del   |
| NA17019*A2 | CHINESE                        |         |         | het =/del   |
| NA17063*2  | MEXICAN                        |         |         | het =/del   |
| NA17068*A2 | MEXICAN                        |         |         | het =/del   |
| NA17698*1  | MEXICAN-AMERICAN               |         |         | het =/del   |
| NA17086*2  | SOUTHEAST ASIANS               |         |         | het =/del   |
| NA07348*F1 | <u>CEPH/UTAH PEDIGREE 1345</u> |         |         | hom =/=     |
| NA17020*A1 | CHINESE (VERSION 1)            |         |         | hom =/=     |
| NA17029*1  | INDO PAKISTANI                 |         |         | hom =/=     |
| NA10495*B1 | MBUTI PYGMY POPULATION         |         |         | hom =/=     |
| NA17064*A2 | MEXICAN                        |         |         | hom =/=     |
| NA13619*2  | RUSSIAN - KRASNODAR            |         |         | hom =/=     |
| NA17312*2  | SOUTH AMERICA                  |         |         | hom =/=     |
| NA13610*2  | AMI POPULATION                 |         |         | hom del/del |
| NA13608*2  | <u>AMI POPULATION</u>          |         |         | hom del/del |
| NA10493*A1 | MBUTI PYGMY POPULATION         |         |         | hom del/del |
| NA17448*2  | MEXICAN-AMERICAN               |         |         | hom del/del |
| NA17684*1  | MEXICAN-AMERICAN               |         |         | hom del/del |
| NA17077*A1 | PUERTO RICAN                   |         |         | hom del/del |

---
