# Supplementary material for: NANOGP8: Evolution of a Human-Specific Retro-Oncogene
Source: PubMed Central journal article supplement (PMC3484675; doi:10.1534/g3.112.004366), 2012-11-01
Supplement: supp_2.11.1447_FileS5.pdf [file supp_2.11.1447_FileS5.pdf]

**An Analysis of Previously Published Efforts to Distinguish RT-PCR Products Derived from *NANOG* and *NANOGP8* in Cancer Cells**

Because both *NANOG* and *NANOGP8* may be transcriptionally active in cancer cells, accurate distinction of their RT-PCR products is essential for gene-expression research. The genomic differences between *NANOG* and *NANOGP8* are considerably greater than those in RT-PCR products, due to the presence of introns in *NANOG* and their absence in *NANOGP8*, and different flanking sequences at the genomic borders of *NANOG* and *NANOGP8* the insertion boundaries of *NANOGP8*. Ultimately, RT-PCR products must be distinguished based on variants within the mRNA that differ between the two in the cell cultures under study. Researchers who have studied differential expression of *NANOG* and *NANOGP8* in cancer cells have relied on a variety of differences between *NANOG* and *NANOGP8* sequences in genomic reference assemblies for experimental distinction of RT-PCR products. According to our experimental results, however, differences in reference assemblies may be unreliable because they may represent modern polymorphisms present in a subset of individuals.

Zhang et al. (2006) published the first evidence that *NANOGP8* is a retrogene expressed in cancer cells. They utilized primers capable of amplifying RT-PCR products from both *NANOG* and *NANOGP8*, but distinguished the two through sequencing the reading frame of their RT-PCR products. The sequences they identified as belonging to *NANOGP8* contained variants we identified as evidently fixed in *NANOGP8* (*c.144G>A* and *c.759G>C*), confirming the accuracy of their identifications. Likewise, Zhang et al. (2010) and Uchino et al. (2012) utilized primers capable of amplifying RT-PCR products from both *NANOG* and *NANOGP8* and sequenced their RT-PCR products confirming their correct identities.

Jeter et al. (2009, 2011), Ma et al. (2010, 2012), and Ibrahim et al. (2012) relied on the 22-nucleotide pair deletion in the 3' UTR of *NANOGP8* (*c.\*552\_\*573del*) as a site for primers and probes to distinguish *NANOG* from *NANOGP8* qRT-PCR products, presuming this deletion to be unique to *NANOGP8* based on an earlier human genome reference assembly. Our results demonstrate that this deletion is uniformly present in *NANOGP8* but highly polymorphic in *NANOG*. Its use as a primer-binding site for RT-PCR should result in reliable amplification of *NANOGP8* fragments but may also result in amplification of fragments of identical size from *NANOG*, if *NANOG* is transcribed in those

cells and if the cells are from individuals who carry the *c.\*552\_\*573del* allele of *NANOG* (a majority of individuals according to our results). Jeter et al. (2009) and Ibrahim *et al.* (2012) sequenced RT-PCR products they obtained, confirming the correct identifications of these products as belonging to *NANOGP8* or *NANOG* on the basis of reading-frame variants that, according to our research, are evidently fixed. There is no indication of sequencing to confirm correct identification of RT-PCR products in other studies utilizing *c.\*552\_\*573del* as primer-binding site (Jeter et al. 2011, Ma et al. 2010, 2012).

Ambady et al. (2010) relied on a *SmaI* RFLP generated by a derived substitution variant in the 3' UTR (*c.\*313C>G*) to distinguish *NANOG* and *NANOGP8* RT-PCR products, presuming the *SmaI* site to be unique to *NANOG* based on reference-sequence comparison. Our results, however, demonstrate that the ancestral *SmaI* site and the derived variant in *NANOGP8* that alters the site to create the RFLP are highly polymorphic in *NANOGP8*, rendering this RFLP unreliable for distinguishing *NANOG* and *NANOGP8* RT-PCR products. However, Ambady et al. (2010) sequenced the RT-PCR products they obtained, confirming their correct identity as *NANOGP8*.

Zbinden et al. (2010) sequenced a region they referred to as “a diagnostic 3' UTR region, which varies among the *NANOG* alleles and *NANOGP8*” (p. 2660), based on their comparison of reference sequences. However, they did not specify which variants they considered as diagnostic. According to our results, all variants in the 3' UTR are modern polymorphisms in either *NANOG* or *NANOGP8*, except *\*606T>G* in *NANOGP8*, which we could not confirm as fixed or polymorphic.

Eberle et al. (2010) utilized RT-PCR to detect *NANOG* transcripts in acute leukemic human cell lines, and concluded that *NANOGP8* was not expressed in these cells. Their conclusion was based on two primer pairs (which they named set a and set b) presumed to amplify fragments from transcripts of both *NANOG* and *NANOGP8*, as well as other *NANOG* pseudogenes. They sequenced the RT-PCR products from these primer pairs but did not state which variants they considered to be reliable identifiers of *NANOG* and *NANOGP8*. One of their primer pairs (set a) should have amplified fragments of identical size from both *NANOG* and *NANOGP8* transcripts, consisting of most of the reading frame. The reverse primer of the other pair (set b), however, had on its 3' end the ancestral G at site c.759, which is present in *NANOG*, but altered in *NANOGP8* by the *c.759G>C* fixed variant. Therefore, this primer pair should have successfully amplified fragments from *NANOG* but not *NANOGP8*. To confirm their conclusion that *NANOGP8* was not expressed in these cells, they utilized a third primer pair they considered to be exclusive to *NANOGP8*, and detected no amplification in any of 60 clones from a single cell line. This primer pair, however, relied on the *c.47C>A* variant on the 3' end of the forward primer for exclusive amplification of *NANOGP8*. Although this derived variant is present in both the current primary and alternate reference assemblies of *NANOGP8*, our results, as well as those of Jeter et al. (2009) and Uchino et al. (2012), show it to be polymorphic

and rare in *NANOGP8*. Moreover, the reverse primer in this pair had the derived T in the *c.531C>T* variant as the third nucleotide from the 3' end of the primer, which is absent in *NANOGP8* and polymorphic in *NANOG*, according to our sequences. Therefore, this primer pair, considered to be *NANOGP8*-specific, is not likely to amplify fragments from either *NANOGP8* or *NANOG* in most individuals, and may explain the lack of amplification observed. Beyond these issues for *NANOGP8* identification, the results of Eberle et al. (2010) are highly pertinent in that alternative splicing of transcripts from *NANOG* and *NANOGP1* was well documented in these cell lines.

Ishiguro et al. (2012) relied on an RFLP resulting from the *c.144G>A* variant in *NANOGP8* to distinguish *NANOG* and *NANOGP8* RT-PCR products. Our data suggest that this is a reliable variant due to evident fixation of the ancestral allele in *NANOG* and the derived allele in *NANOGP8*.

Our observations of widespread modern polymorphisms in *NANOG* and *NANOGP8* underscore the unreliability of variants between reference sequences for accurate experimental identification of RT-PCR products. Instead, the most reliable method to distinguish *NANOG* from *NANOGP8* RT-PCR products is to sequence genomic-DNA specific to *NANOG* and *NANOGP8* from the cell lines being researched to identify which variants distinguish the two in any particular cell line, then use those variants to accurately identify sequenced RT-PCR products for each line. Several of the primer pairs we used (see Table 1 in the main text of the article) are capable of generating PCR fragments specific to *NANOG* or *NANOGP8* from genomic DNA (albeit not from mRNA for RT-PCR), and may be useful for such genomic-DNA sequencing.
